# Supplementary material for: The design of phenylboronic acid azoprobe–polyamidoamine dendrimer complexes as supramolecular sensors for saccharide recognition in water
Source: Royal Society of Chemistry journal article supplement (doi:10.1039/c4nj01309c), 2015-01-01
Supplement: c4nj01309c1.pdf [file c4nj01309c1.pdf]

## Electronic Supplementary Information

# The design of phenylboronic acid azoprobe/polyamidoamine dendrimer complexes as a supramolecular sensor for saccharide recognition in water

Yuji Tsuchido,<sup>a</sup> Yuuki Sakai,<sup>a</sup> Keisuke Aimu,<sup>a</sup> Takeshi Hashimoto,<sup>a</sup> Kazunari Akiyoshi,<sup>b,c</sup> and  
Takashi Hayashita\*<sup>a</sup>

<sup>a</sup> *Department of Materials and Life Sciences, Faculty of Science and Technology, Sophia University, 7-1 Kioi-cho, Chiyoda-ku, Tokyo 102-8554, Japan. Fax: +81-3-3238-3361; Tel: +81-3-3238-3372; E-mail: ta-hayas@sophia.ac.jp*

<sup>b</sup> *Department of Polymer Chemistry, Graduate School of Engineering, Kyoto University, Kyotodaigaku-Katsura, Nishikyo-ku, Kyoto 615-8510, Japan. Fax: +81-75-383-2590; Tel: +81-75-383-2589*

<sup>c</sup> *ERATO Bio-nanotransporter Project, Japan Science and Technology Agency (JST), Katsura Int'tech Center, Kyotodaigaku-Katsura, Nishikyo-ku, Kyoto 615-8530, Japan*

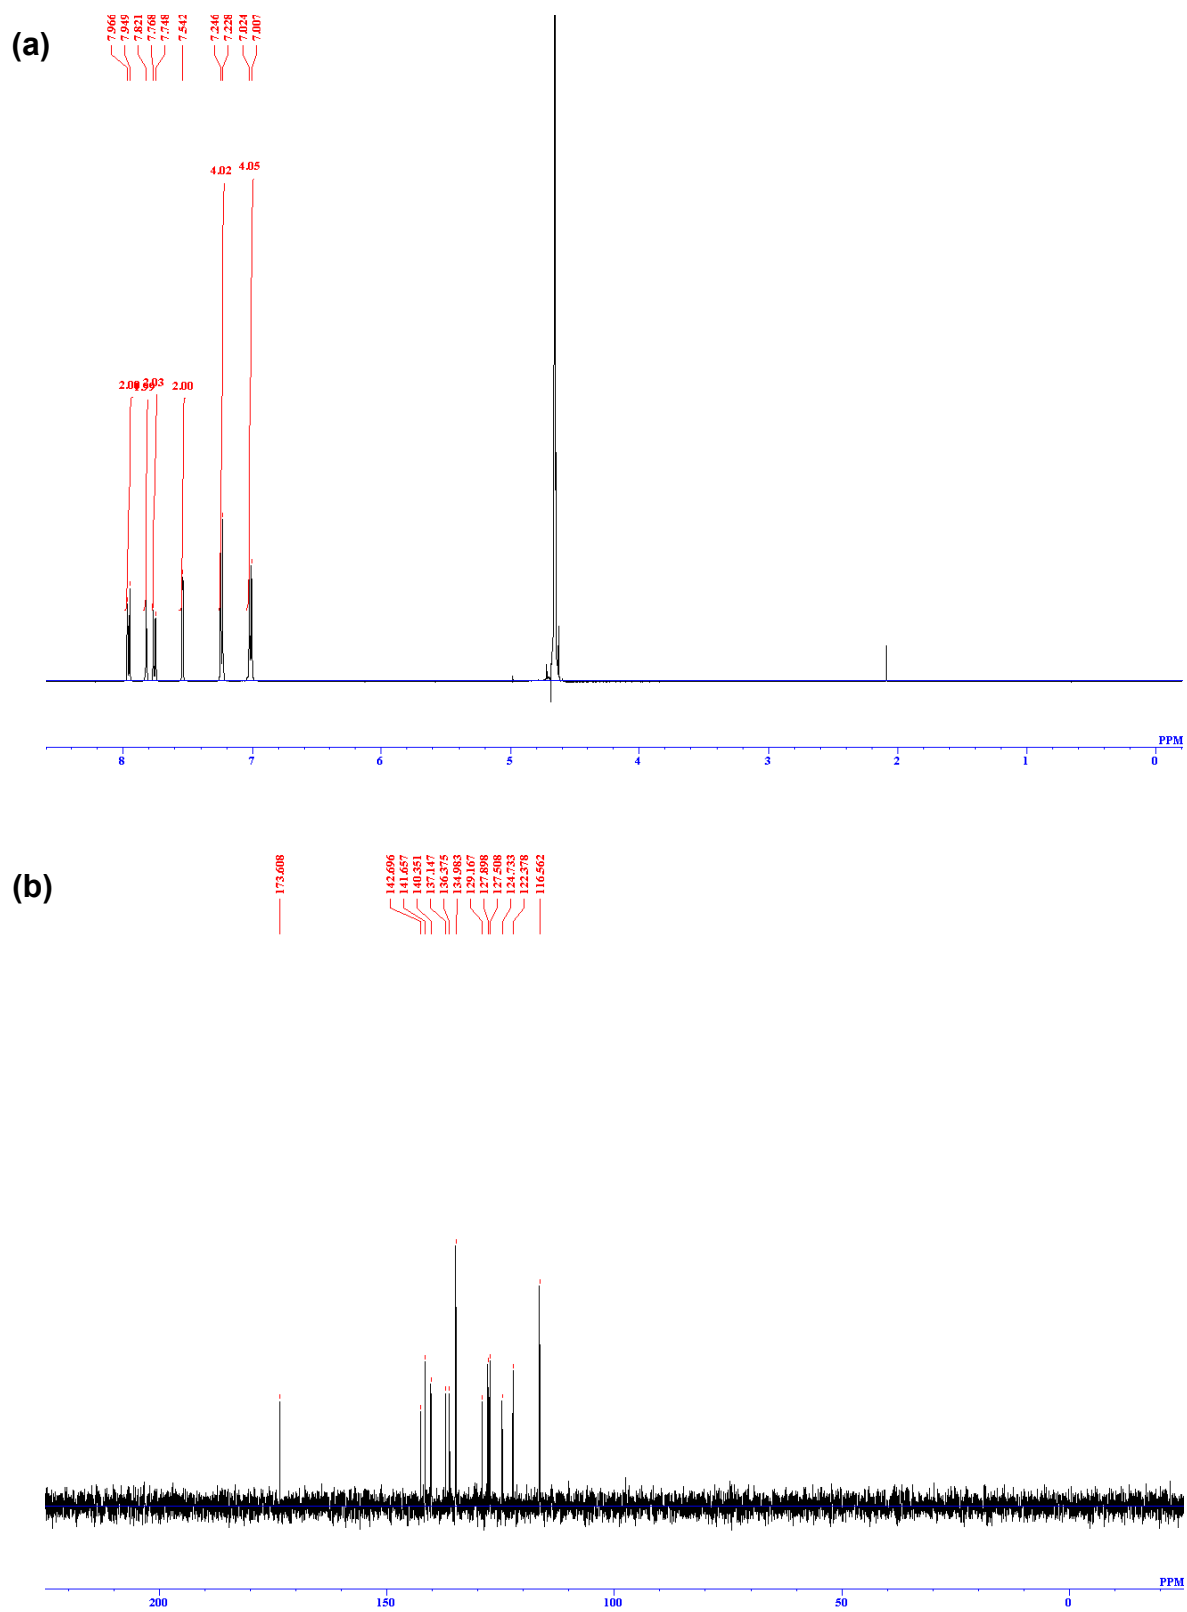

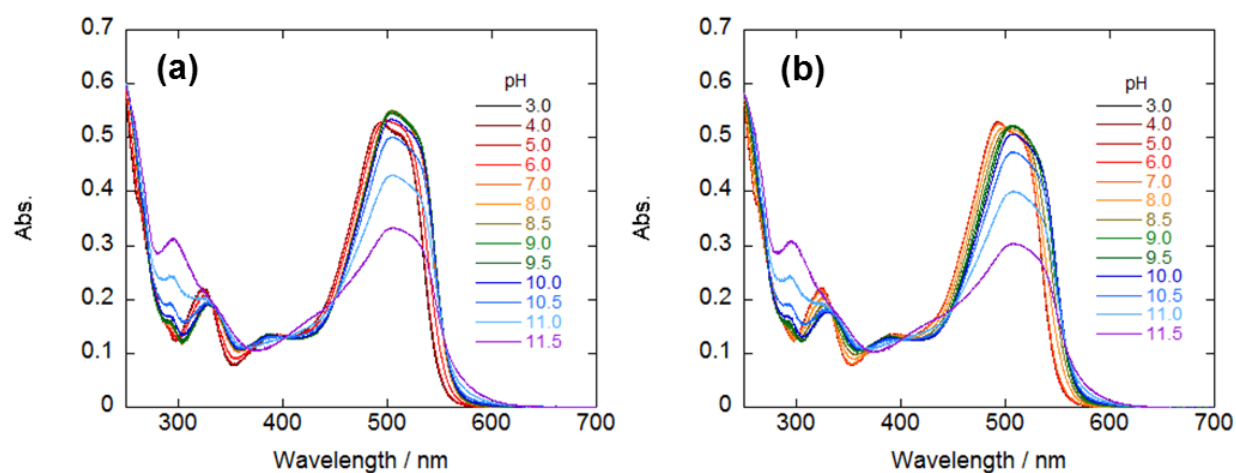

Figure S2. UV-Vis spectral changes of 1-BAzo-NP by changing pH. [1-BAzo-NP] = 0.02 mM, [fructose] = (a) 30 mM, (b) 0 mM,  $[H_3PO_4]$  = 1.0 mM.

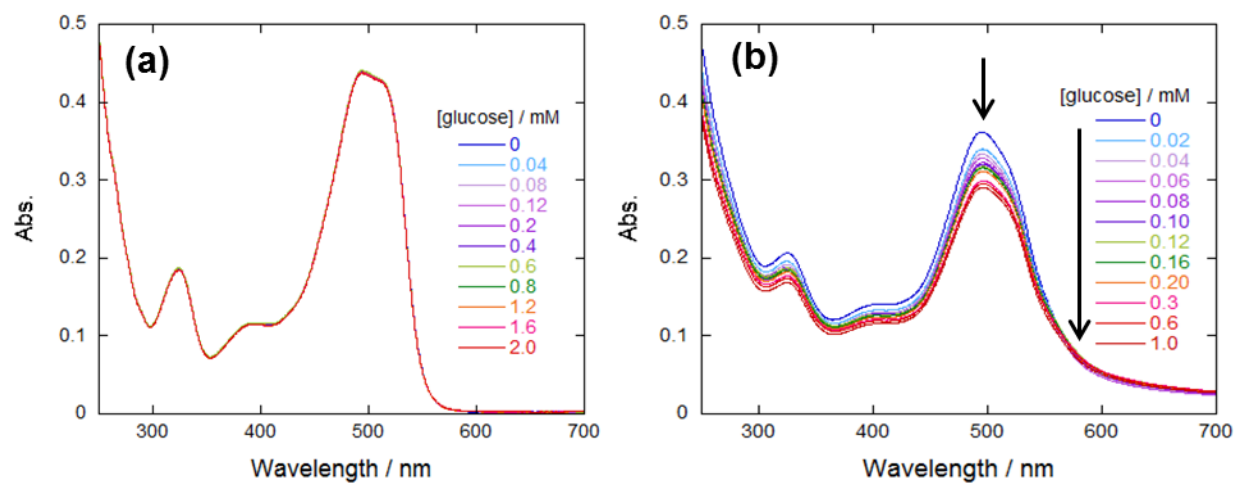

Figure S3. Spectral changes of (a) 1-BAzo-NP and (b) 1-BAzo-NP/PAMAM-G4 by the addition of glucose. [1-BAzo-NP] = 0.02 mM, [PAMAM-G4] = (a) 0 or (b) 0.62  $\mu$ M (amine unit base: 0.04 mM), [saccharide] = 0-2 mM,  $[H_3PO_4]$  = 1 mM, pH 7.0.

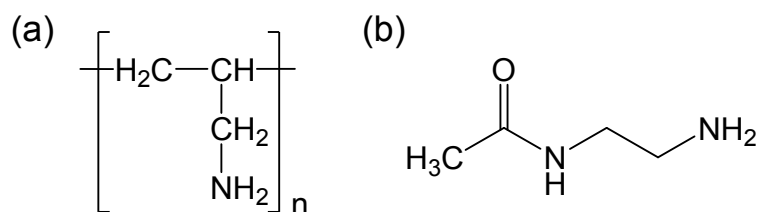

Figure S4. Chemical structure of (a) polyallylamine and (b) *N*-(2-aminoethyl)acetamide.

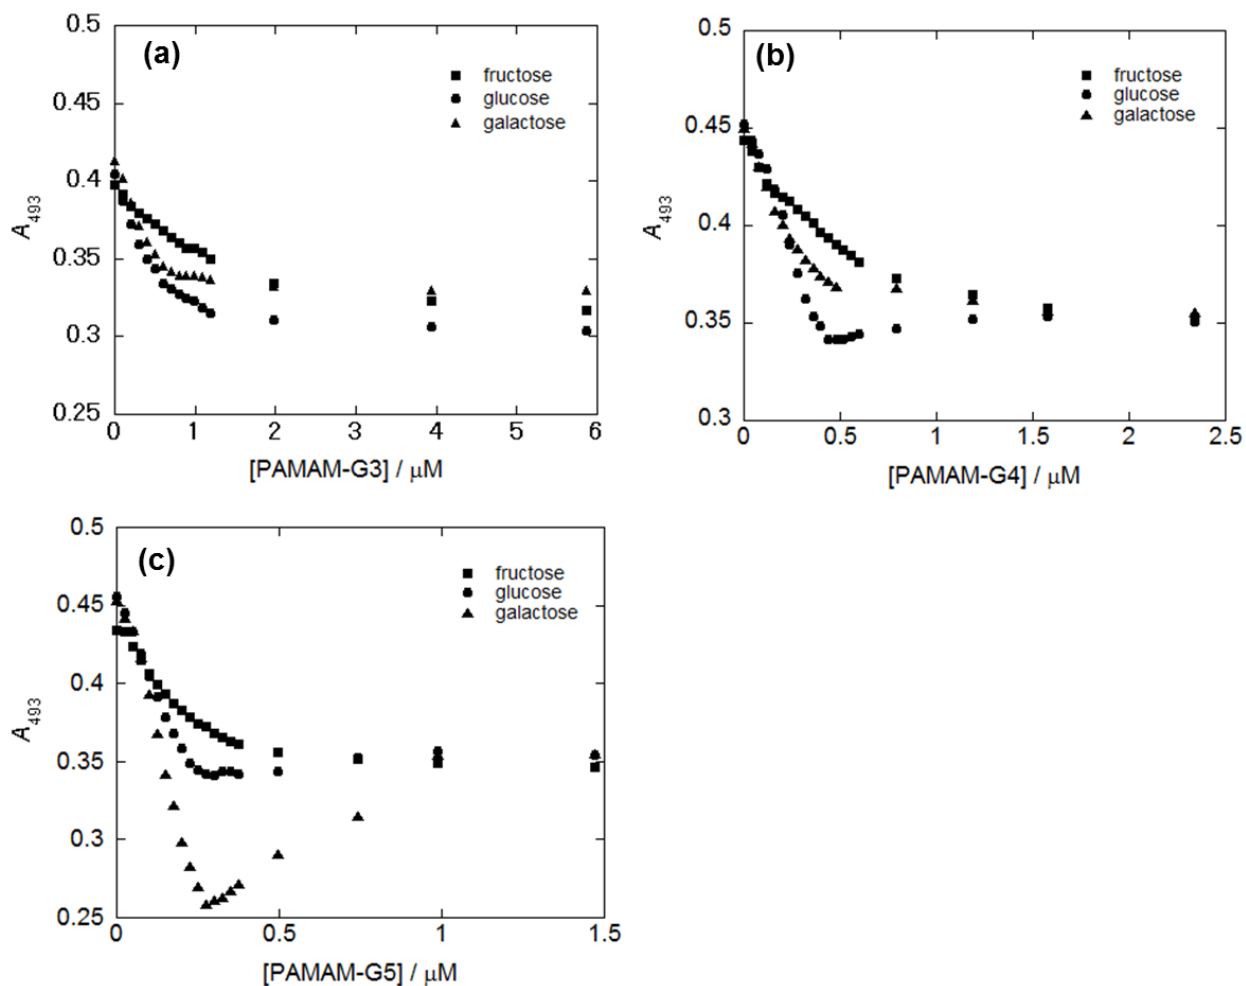

Figure S5. Changes of the absorption at 493 nm of 1-BAzo-NP with various saccharides (none, fructose, glucose, galactose) by the addition of (a) PAMAM-G3, (b) PAMAM-G4, and (c) PAMAM-G5. [1-BAzo-NP] = 0.02 mM, [saccharide] = 30 mM, [ $\text{H}_3\text{PO}_4$ ] = 1.0 mM, pH 7.0, and (a) [PAMAM-G3] = 0-6  $\mu\text{M}$  (amine unit base: 0-0.2 mM), (b) [PAMAM-G4] = 0-3  $\mu\text{M}$  (amine unit base: 0-0.2 mM), (c) [PAMAM-G5] = 0-1.5  $\mu\text{M}$  (amine unit base: 0-0.2 mM).
